# Supplementary material for: Construction of photoluminescence-afterglow dual-mode white emission materials from carbon dots via Förster resonance energy transfer
Source: Royal Society of Chemistry journal article supplement (doi:10.1039/d4tc01765j), 2024-01-01
Supplement: d4tc01765j2.pdf [file d4tc01765j2.pdf]

## Supporting Information

### Construction of Photoluminescence-Afterglow Dual-Mode White Emission from Carbon Dots via Förster Resonance Energy Transfer

Yuqing Huang,<sup>+a</sup> Yulong Zhu,<sup>+a</sup> Chao Li,<sup>b</sup> Guangsong Zheng,<sup>\*c</sup> Chenxi Zhang,<sup>a</sup> Yang Nan,<sup>a</sup> Qing Lou,<sup>c</sup> Xu Chen,<sup>c</sup> Yongsheng Zhu<sup>\*b</sup> and Jinyang Zhu<sup>\*a</sup>

<sup>a</sup>State Centre for International Cooperation on Designer Low-Carbon & Environmental Materials, School of Materials Science and Engineering, Zhengzhou University, Zhengzhou 450052, P. R. China

<sup>b</sup>College of Physics and Electronic Engineering, Nanyang Normal University, Nanyang 473061, China

<sup>c</sup>Key Laboratory of Material Physics, Ministry of Education, School of Physics and Microelectronics, Zhengzhou University, Zhengzhou 450052, P. R. China

**E-mail:** 13253315403@163.com (G. Zheng), yongshengzhu0001@163.com (Y. Zhu), zhujinyang1127@zzu.edu.cn (J. Zhu)

## Supporting Figures

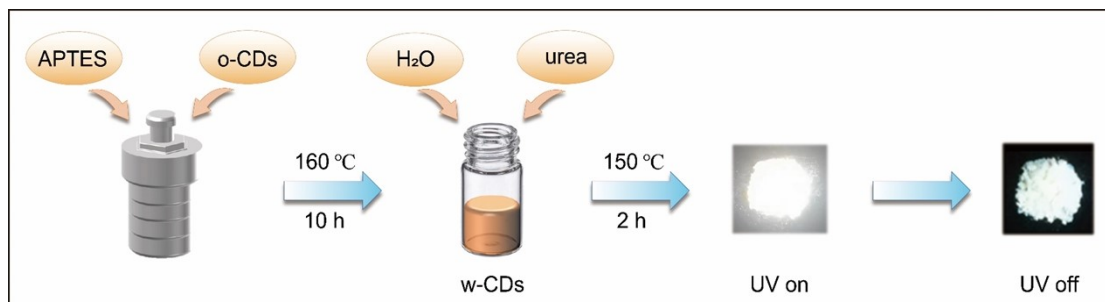

**Fig. S1.** Schematic diagram of the synthesis of w-CDs powder.

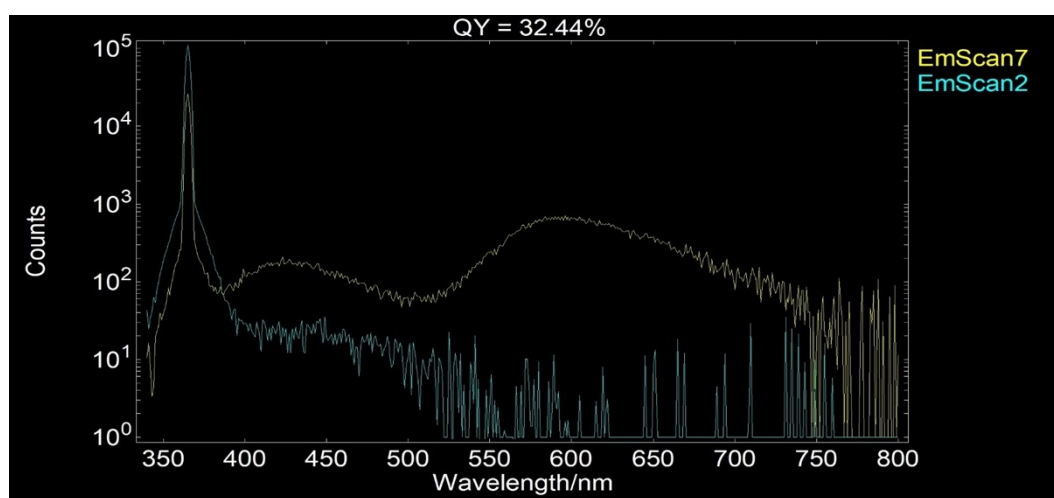

**Fig. S2.** Photoluminescence quantum yield (PLQY) of w-CDs powder, excited with 365 nm UV lamp.

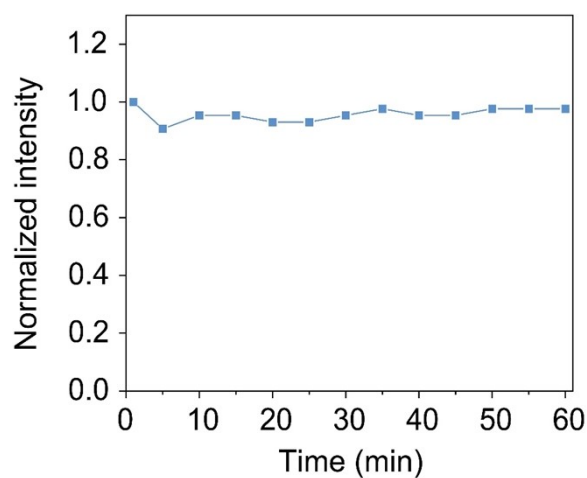

**Fig. S3.** Changes in intensity of w-CDs powder in one hour, excited with 365 nm UV

lamp.

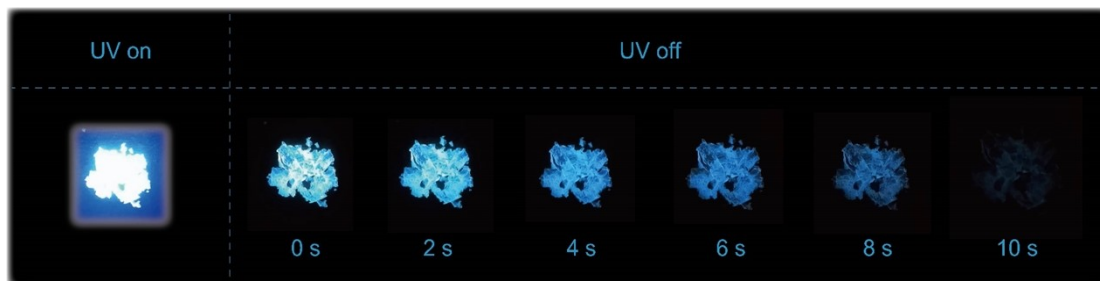

**Fig. S4.** Images of b-CDs powder, taken before and after the excitation of 365 nm UV lamp.

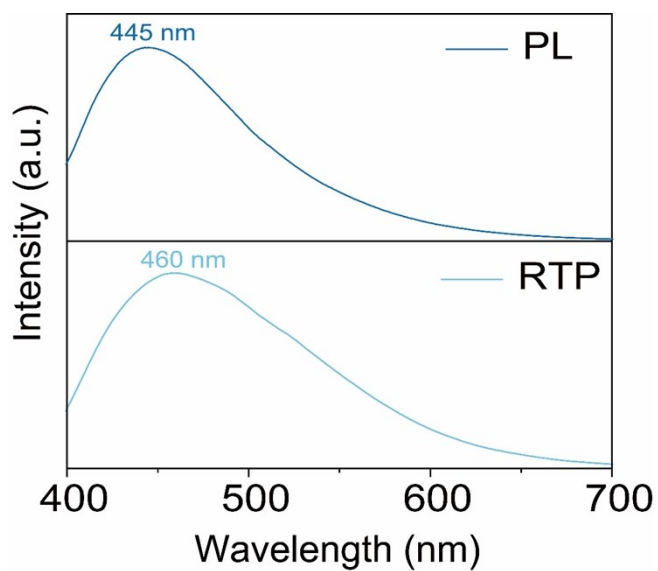

**Fig. S5.** Photoluminescence (PL) and room temperature phosphorescence (RTP) emission spectra of b-CDs powder, excited with 365 nm UV lamp.

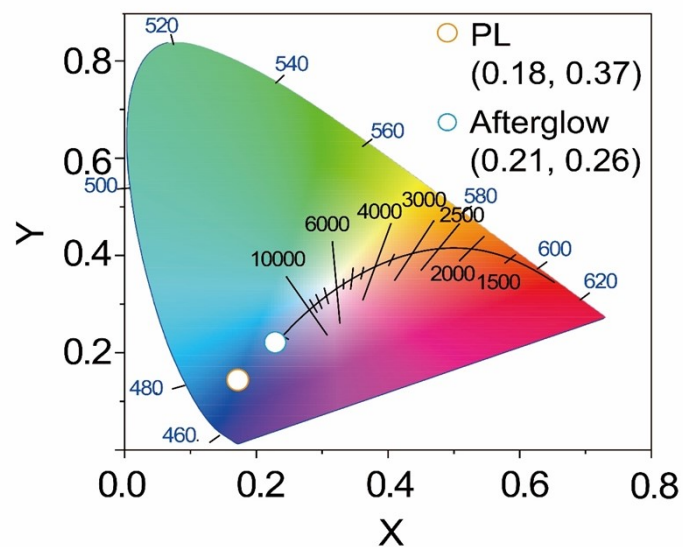

**Fig. S6.** The Commission Internationale de l'Eclairage (CIE) chromaticity diagram shows the PL and RTP coordinates of the b-CDs powder in Fig. S5.

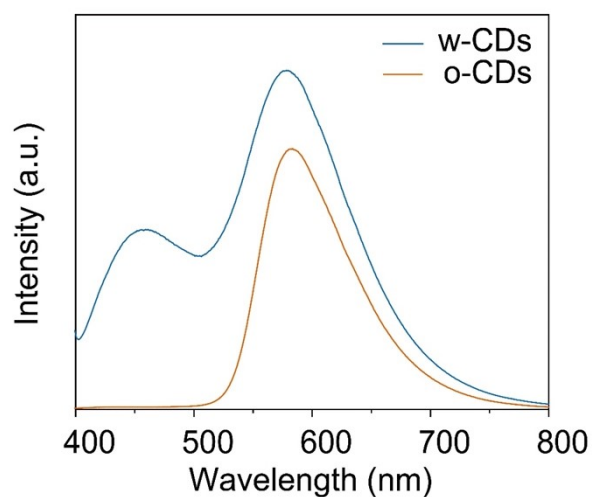

**Fig. S7.** PL emission spectra of o-CDs and w-CDs powder, excited with 365 nm UV lamp.

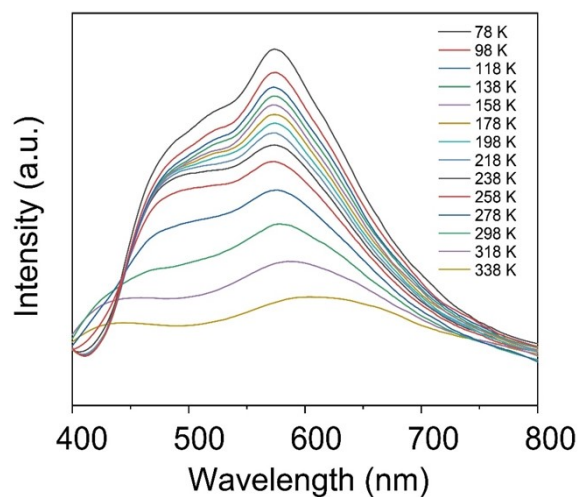

**Fig. S8.** Temperature-dependent afterglow emission spectra of w-CDs powder, excited with 365 nm UV lamp.

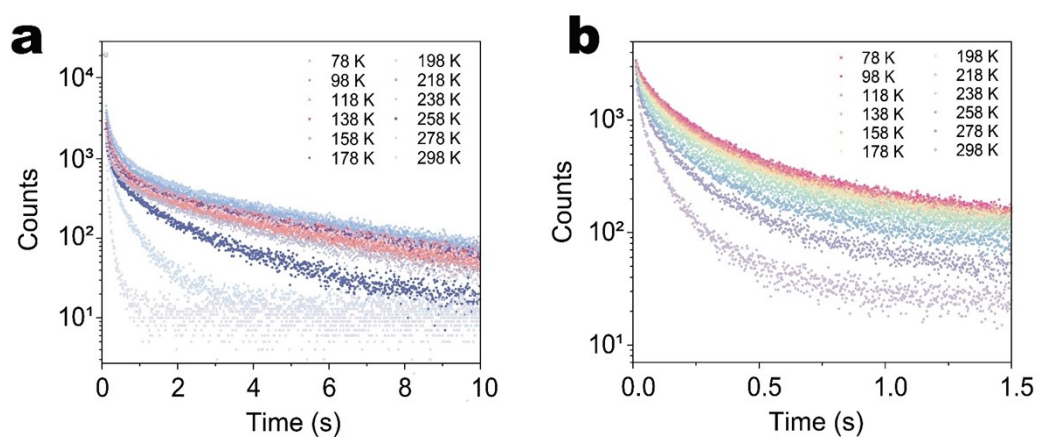

**Fig. S9.** Temperature-dependent decay afterglow spectra of w-CDs powder at donor peak (a) and acceptor peak (b).

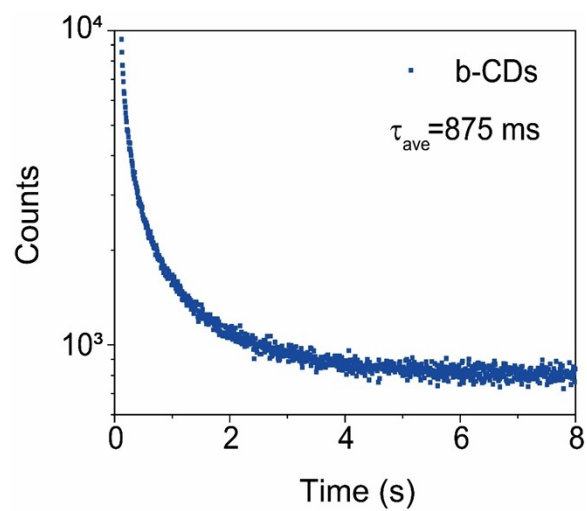

**Fig. S10.** Time-resolved RTP decay spectrum of b-CDs powder.

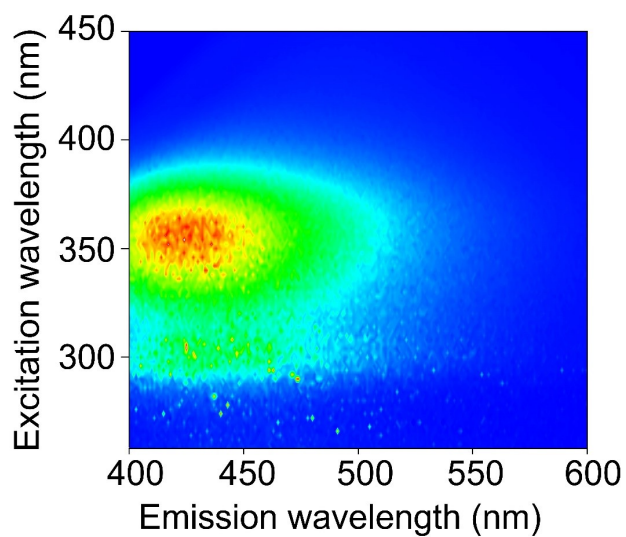

**Fig. S11.** RTP excitation-emission mapping of b-CDs powder.

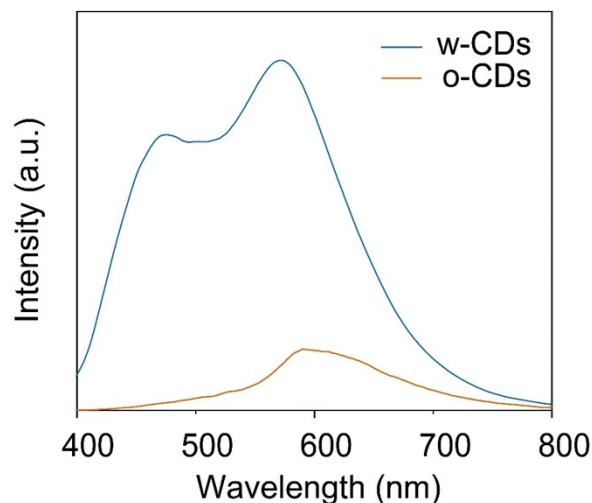

**Fig. S12.** Afterglow emission spectra of o-CDs and w-CDs powders, excited with 365 nm UV lamp.

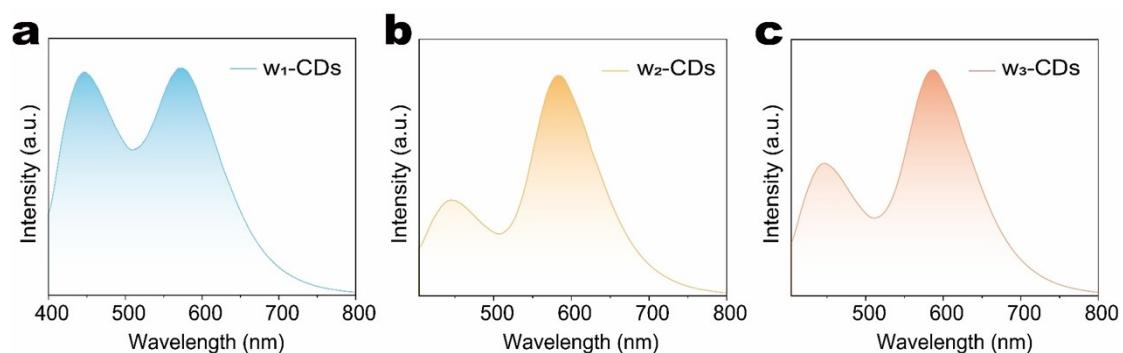

**Fig. S13.** PL emission spectra of  $w_1$ -CDs,  $w_2$ -CDs, and  $w_3$ -CDs powders, respectively, excited with 365 nm UV lamp.

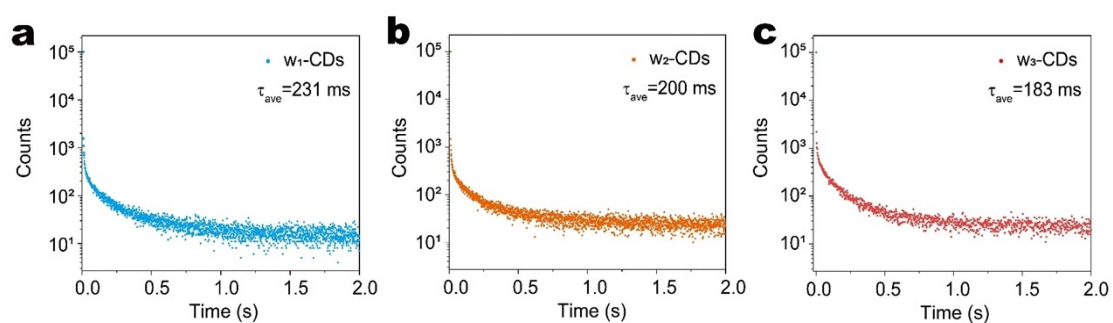

**Fig. S14.** Decay afterglow spectra of  $w_1$ -CDs,  $w_2$ -CDs and  $w_3$ -CDs powders at donor peak.

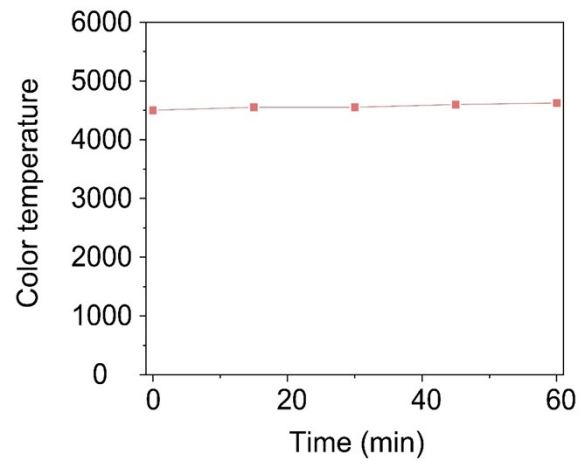

**Fig. S15.** Changes in color temperature of the WLEDs in one hour, excited with 365 nm.
